# Supplementary material
Source: PubMed Central journal article supplement (PMC5020700)

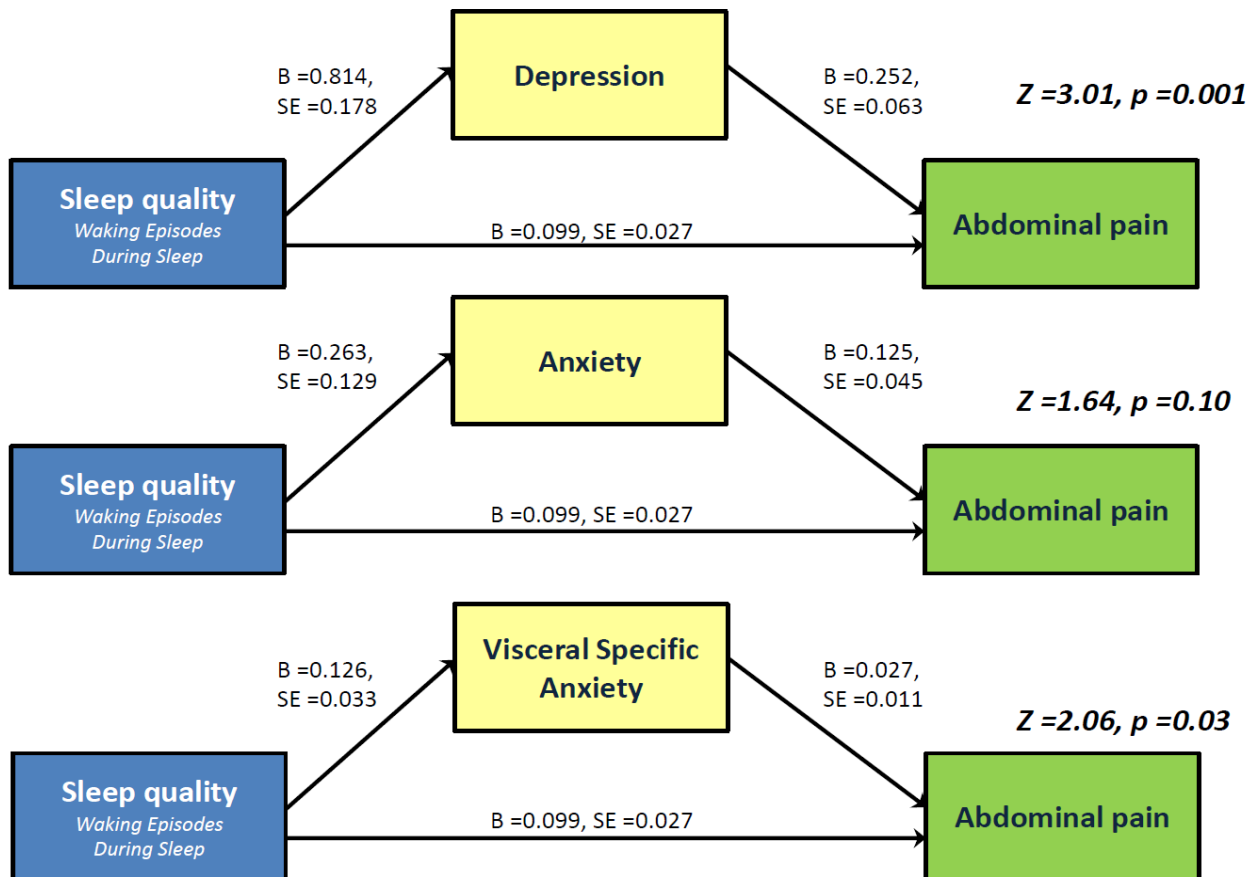

Supplement: NIHMS785275-supplement-Supp_Fig_S1.pdf [file NIHMS785275-supplement-Supp_Fig_S1.pdf]
